# Supplementary material
Source: Springer Nature journal article supplement (https://www.springermedizin.de/resource/supplementary/12986_2008_180_MOESM2_ESM.pdf/25655534)

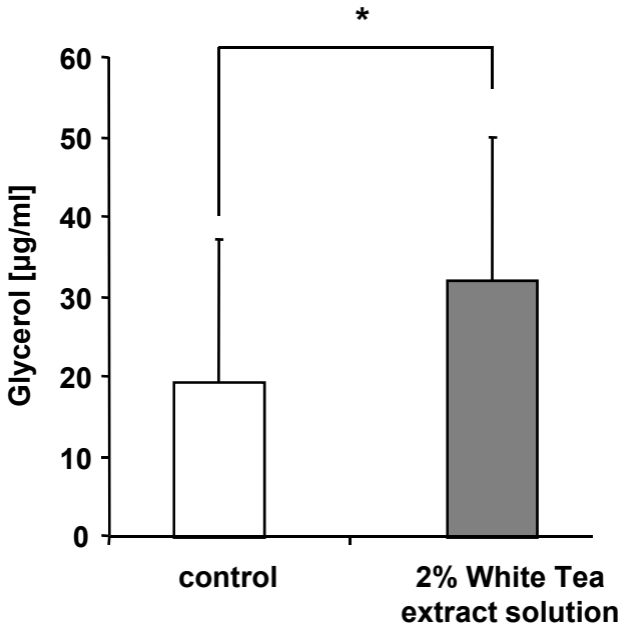

Supplement: MOESM2 [file 25655534]
